# Supplementary material for: Circ_MUC16 attenuates the effects of Propofol to promote the aggressive behaviors of ovarian cancer by mediating the miR-1182/S100B signaling pathway
Source: PubMed Central journal article supplement (PMC8626908; doi:10.1186/s12871-021-01517-0), 2021-11-27

FIG7H

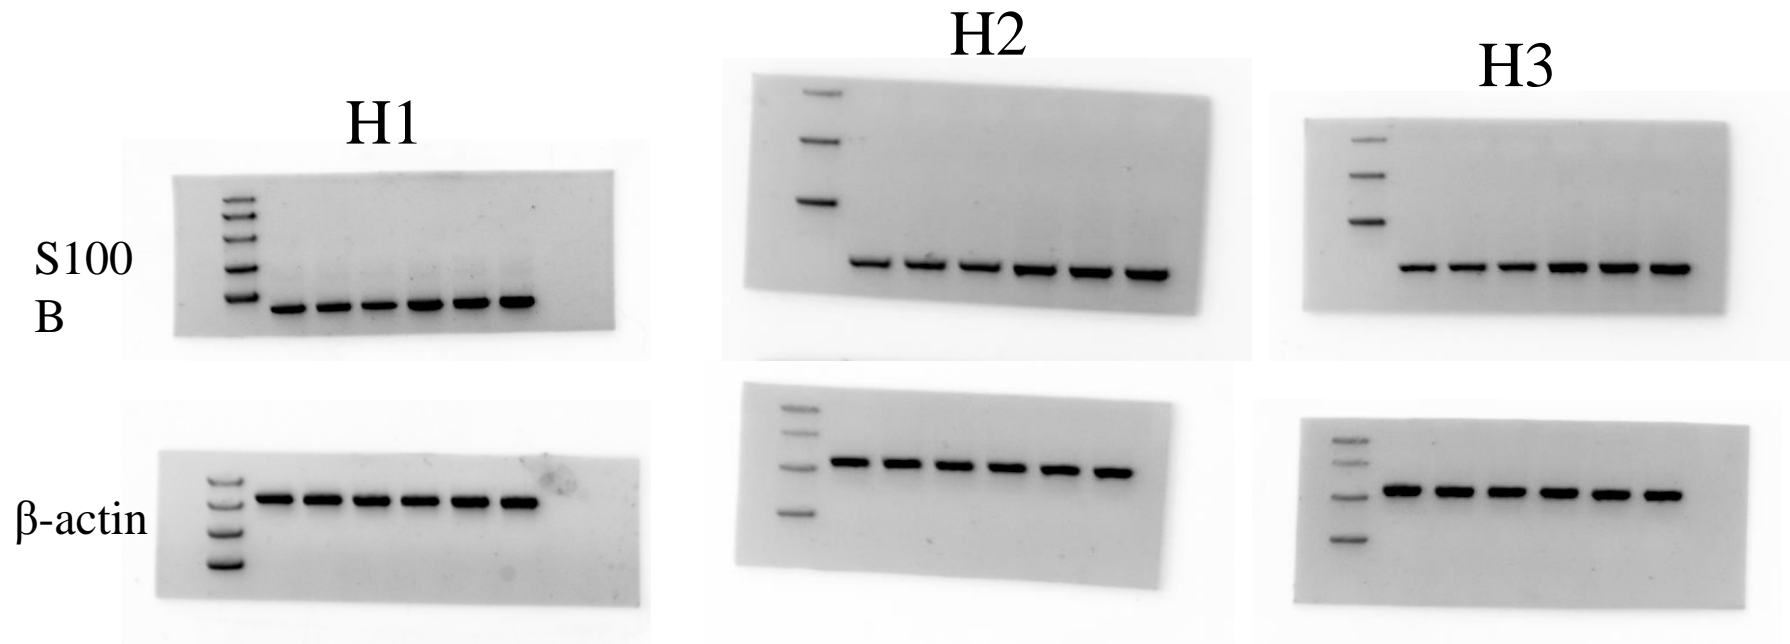

FIG7I

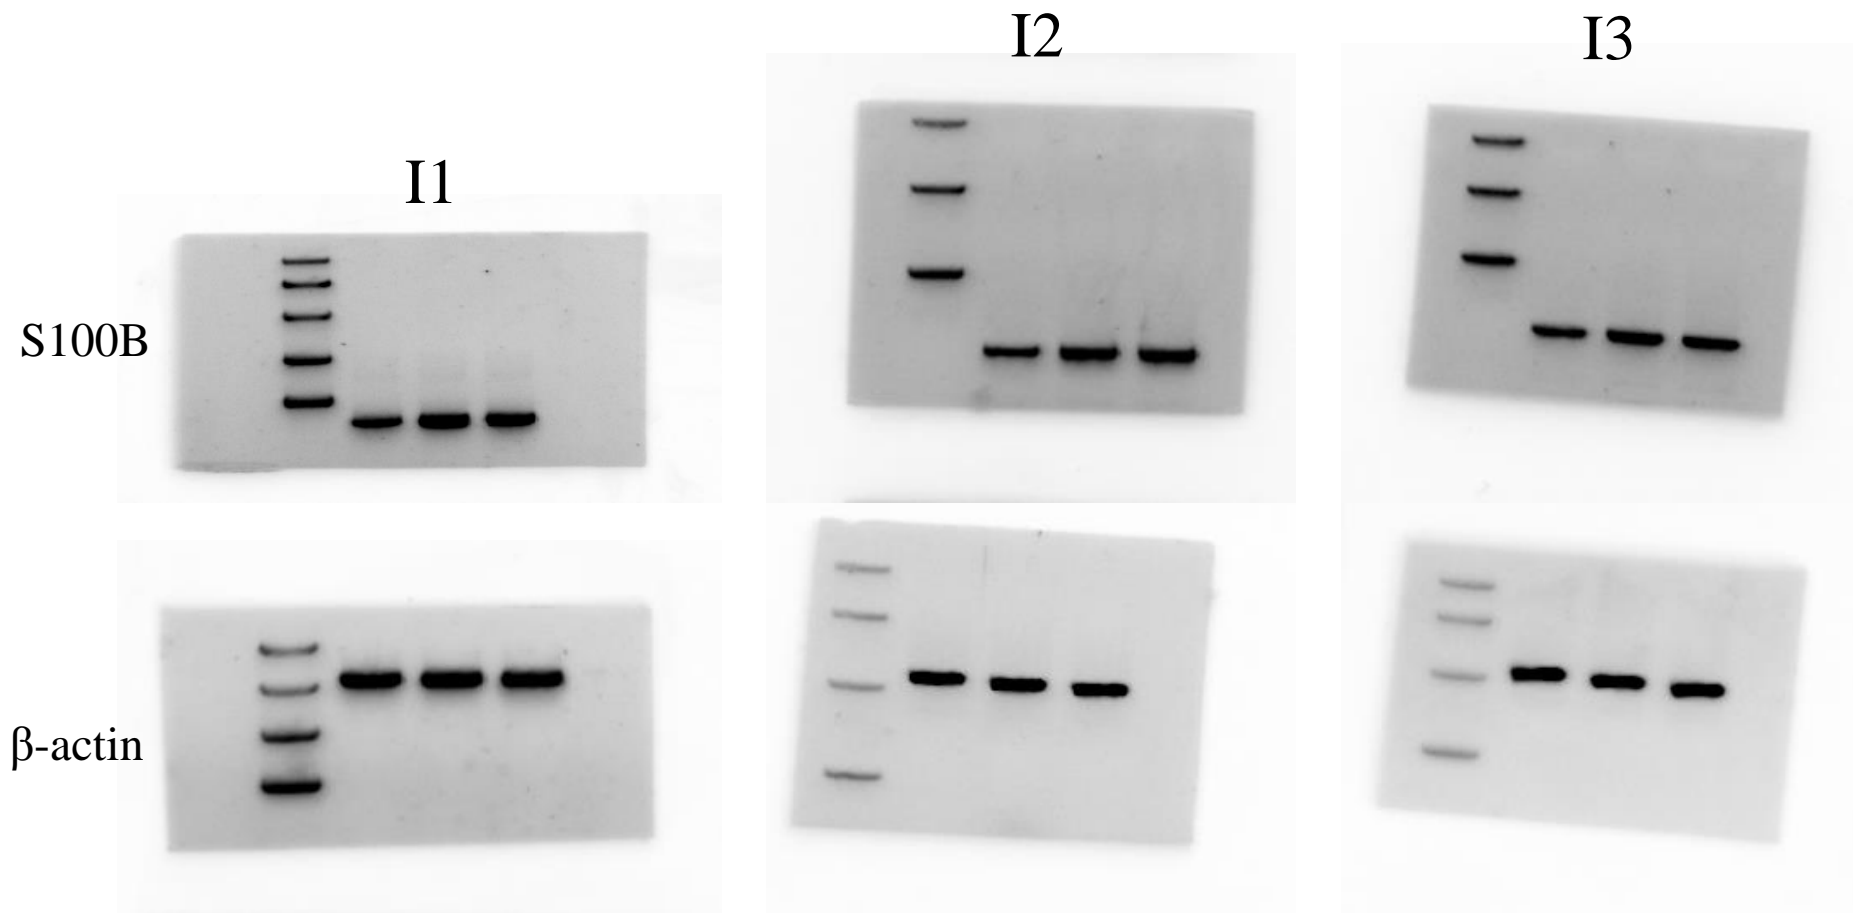

FIG7K

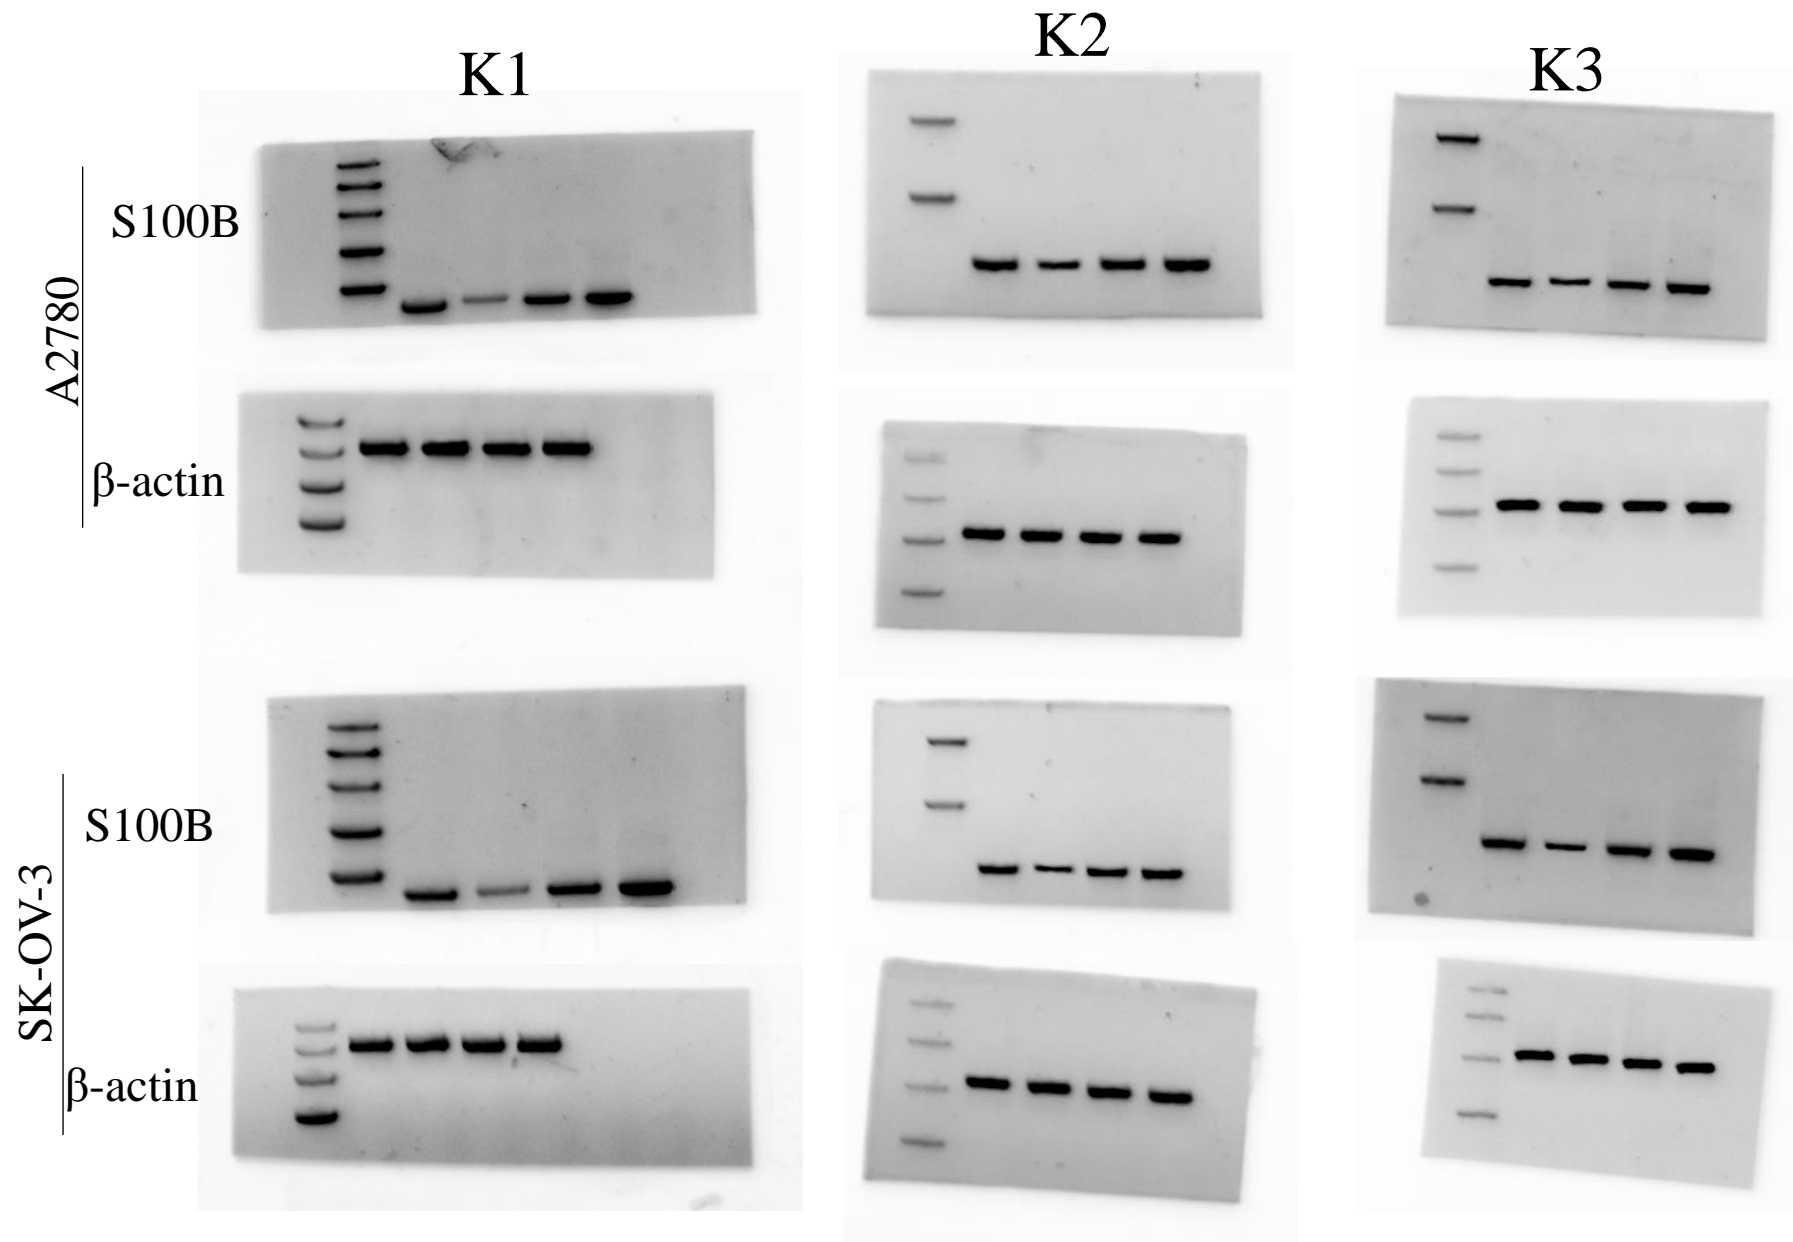

FIG8A

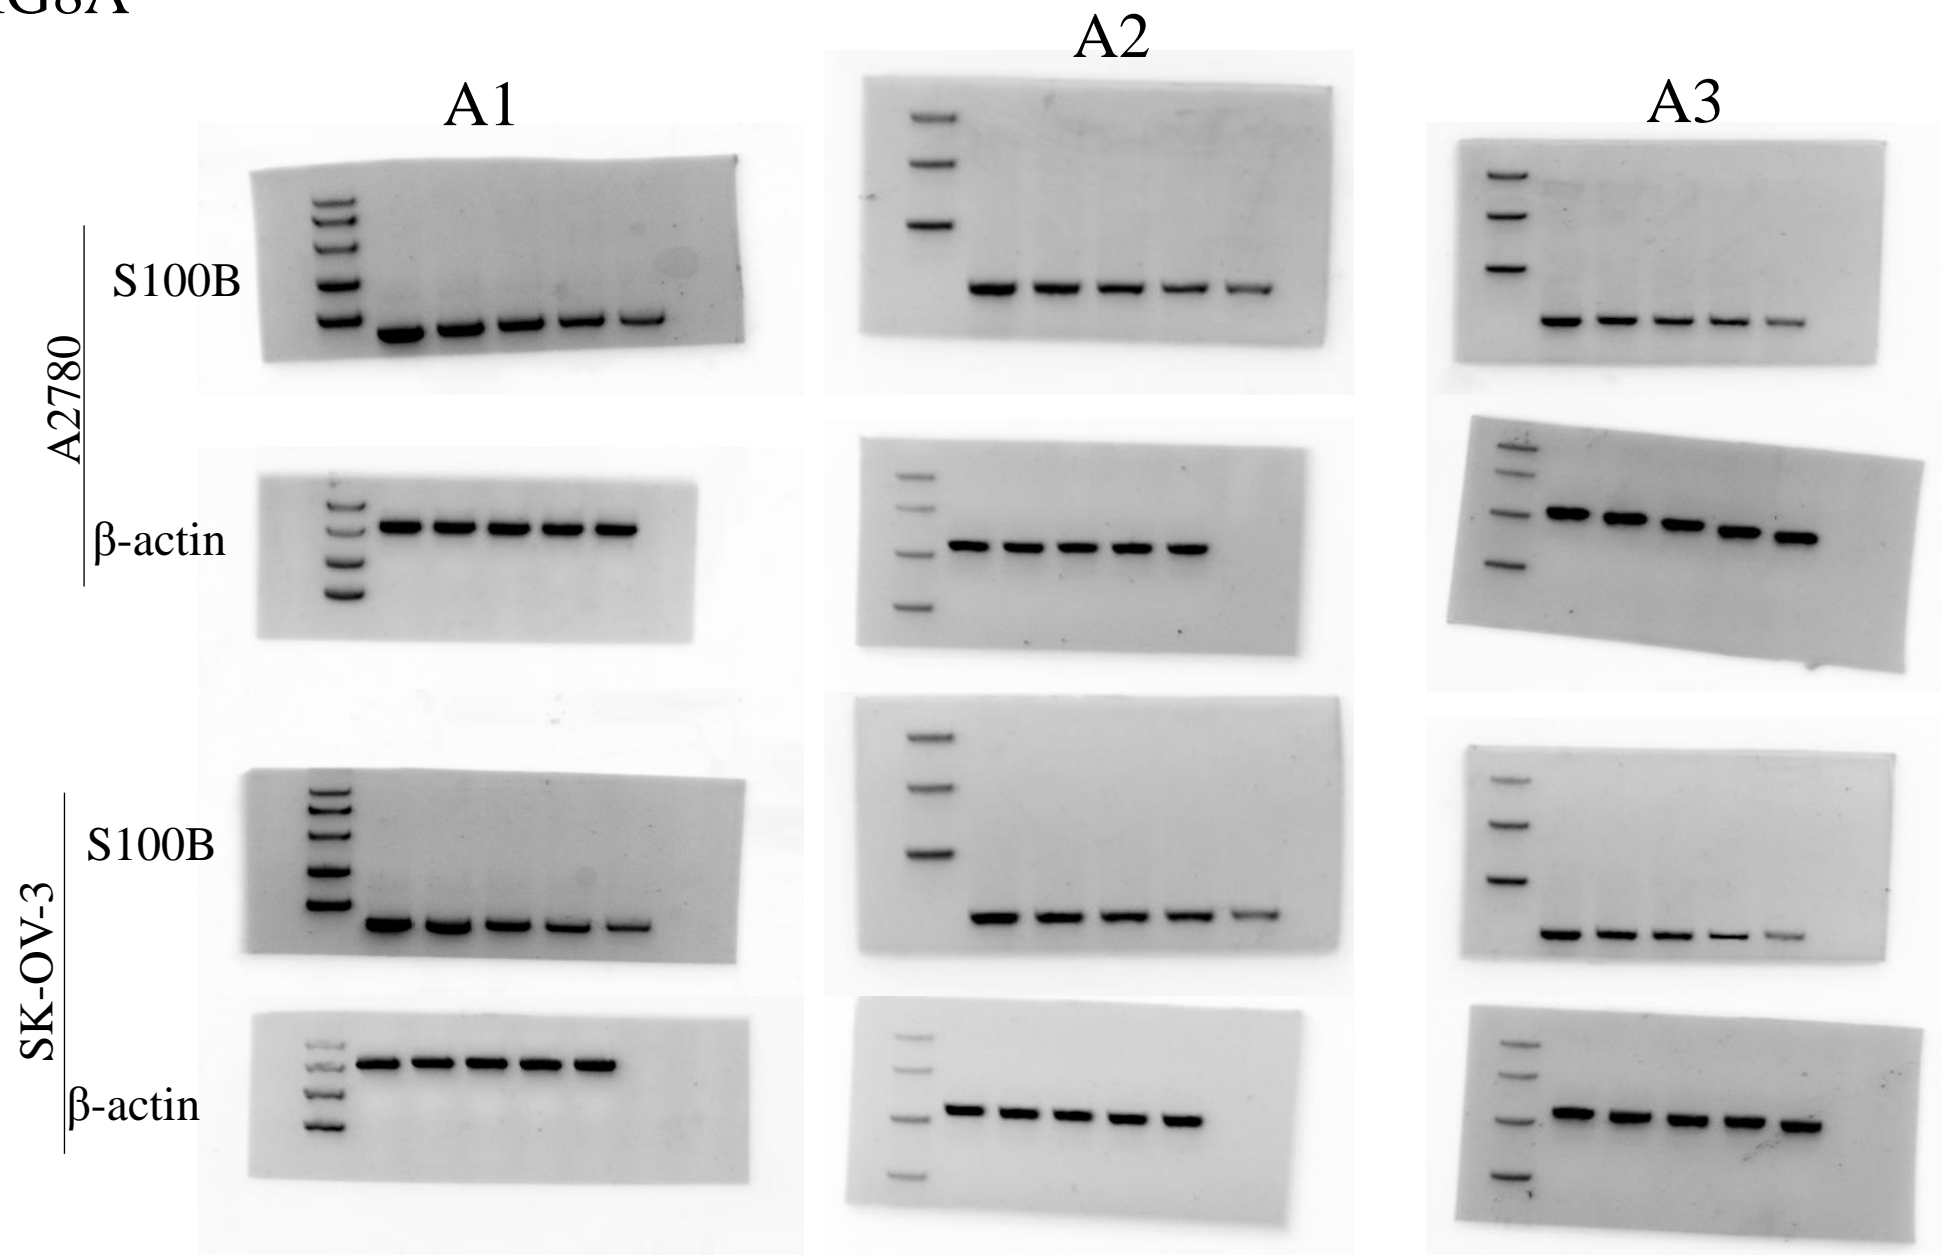

FIG8B

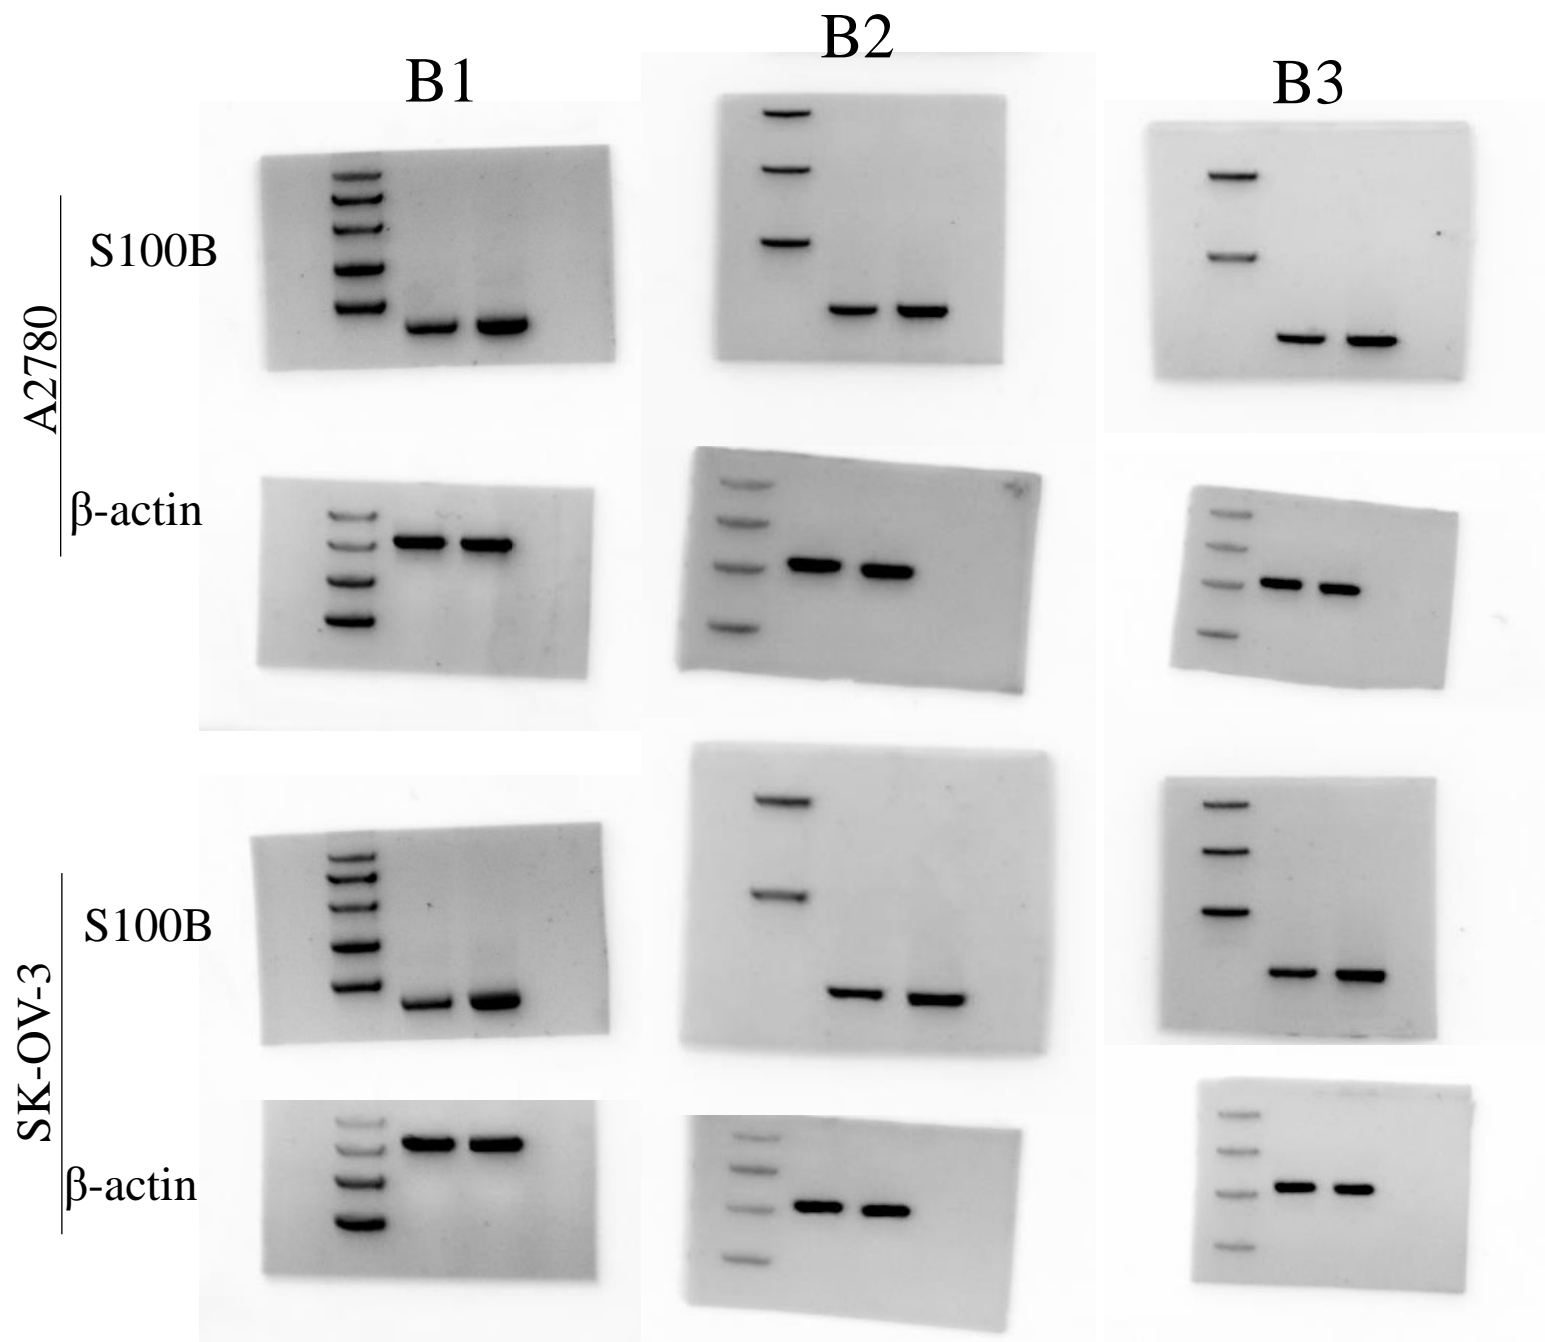

FIG8C

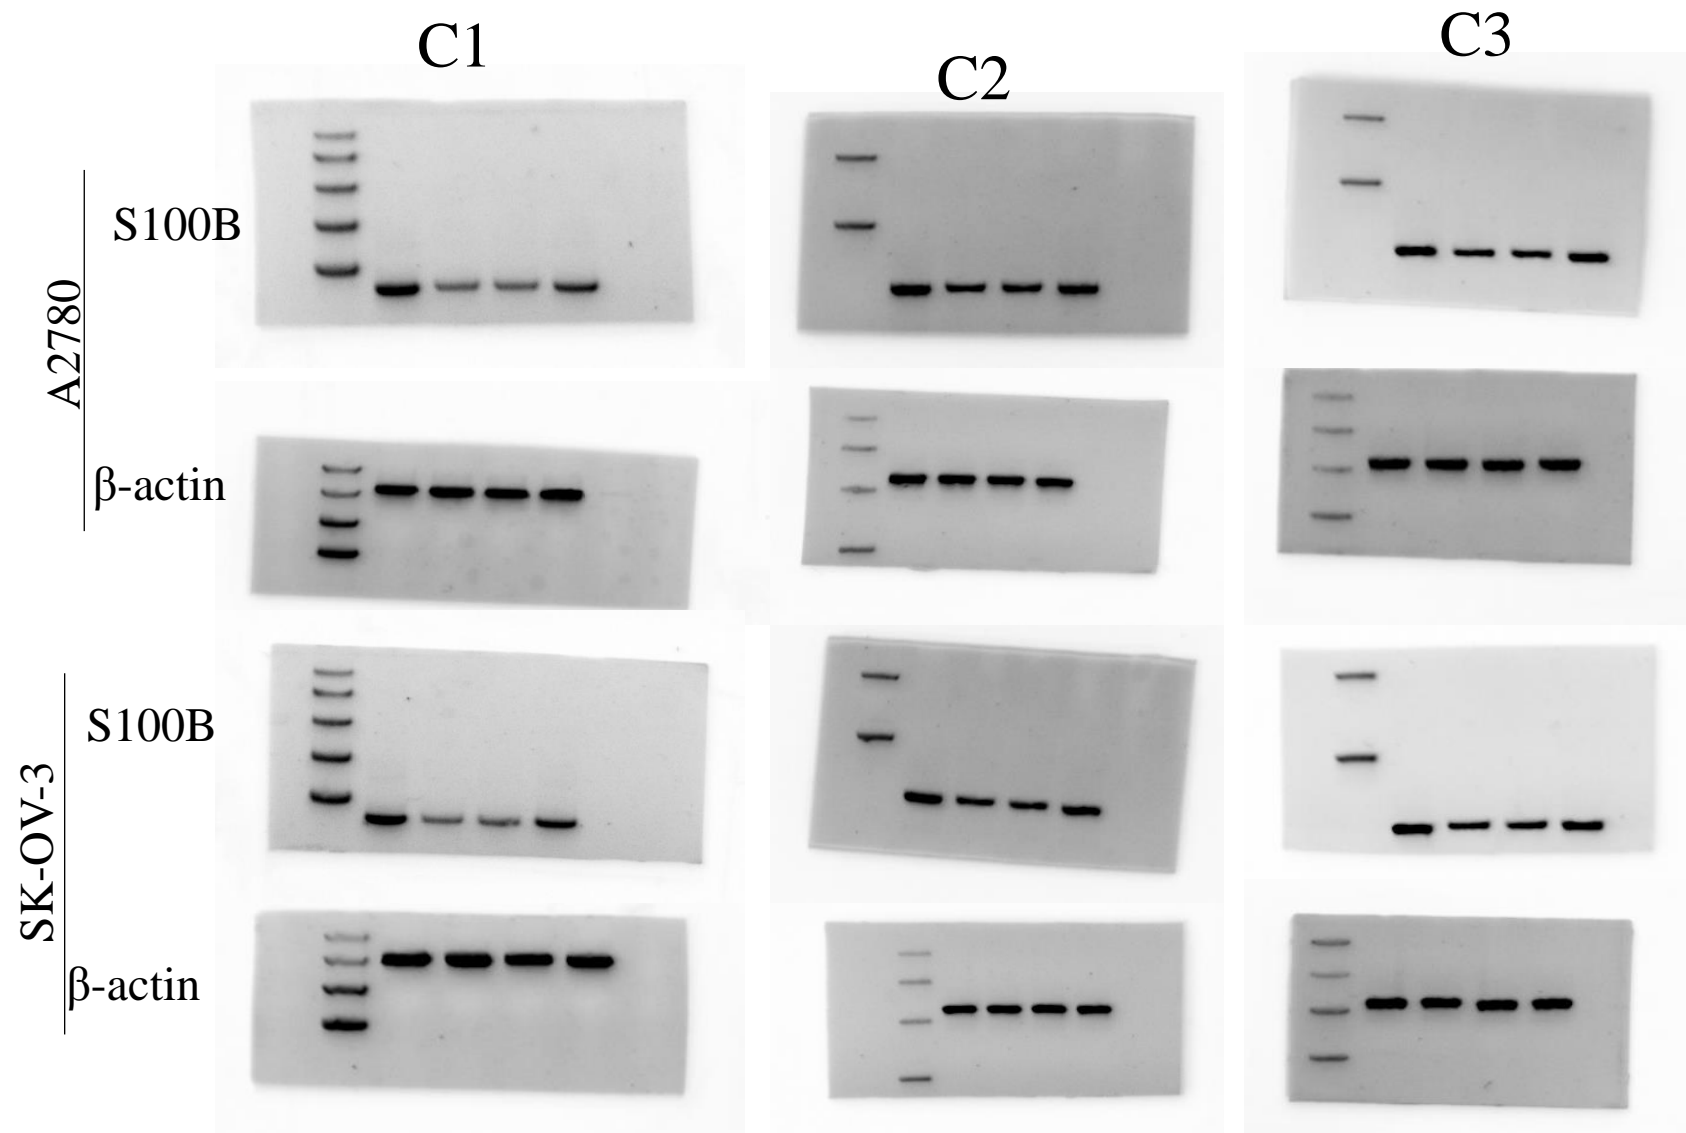

FIG9B

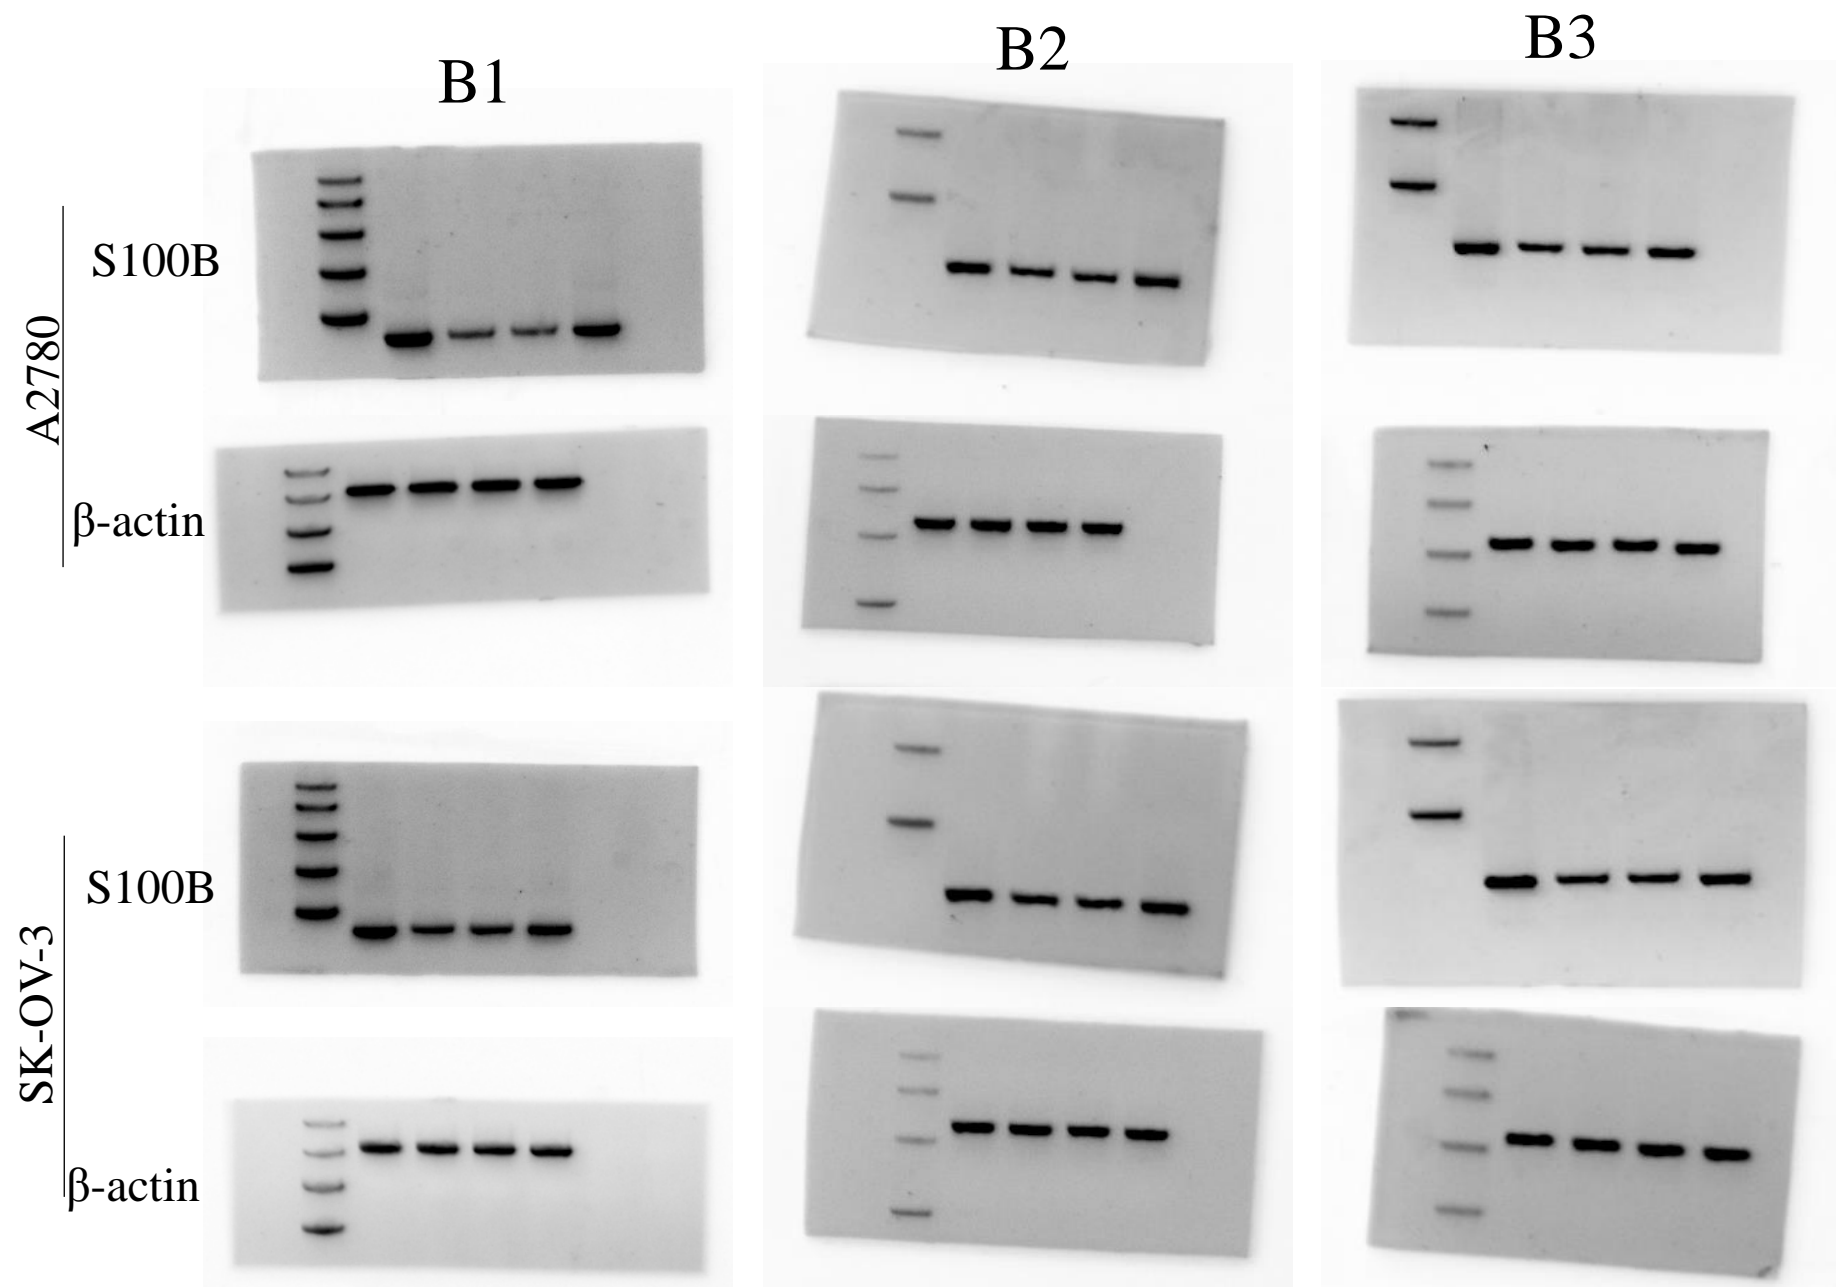

FIG9C

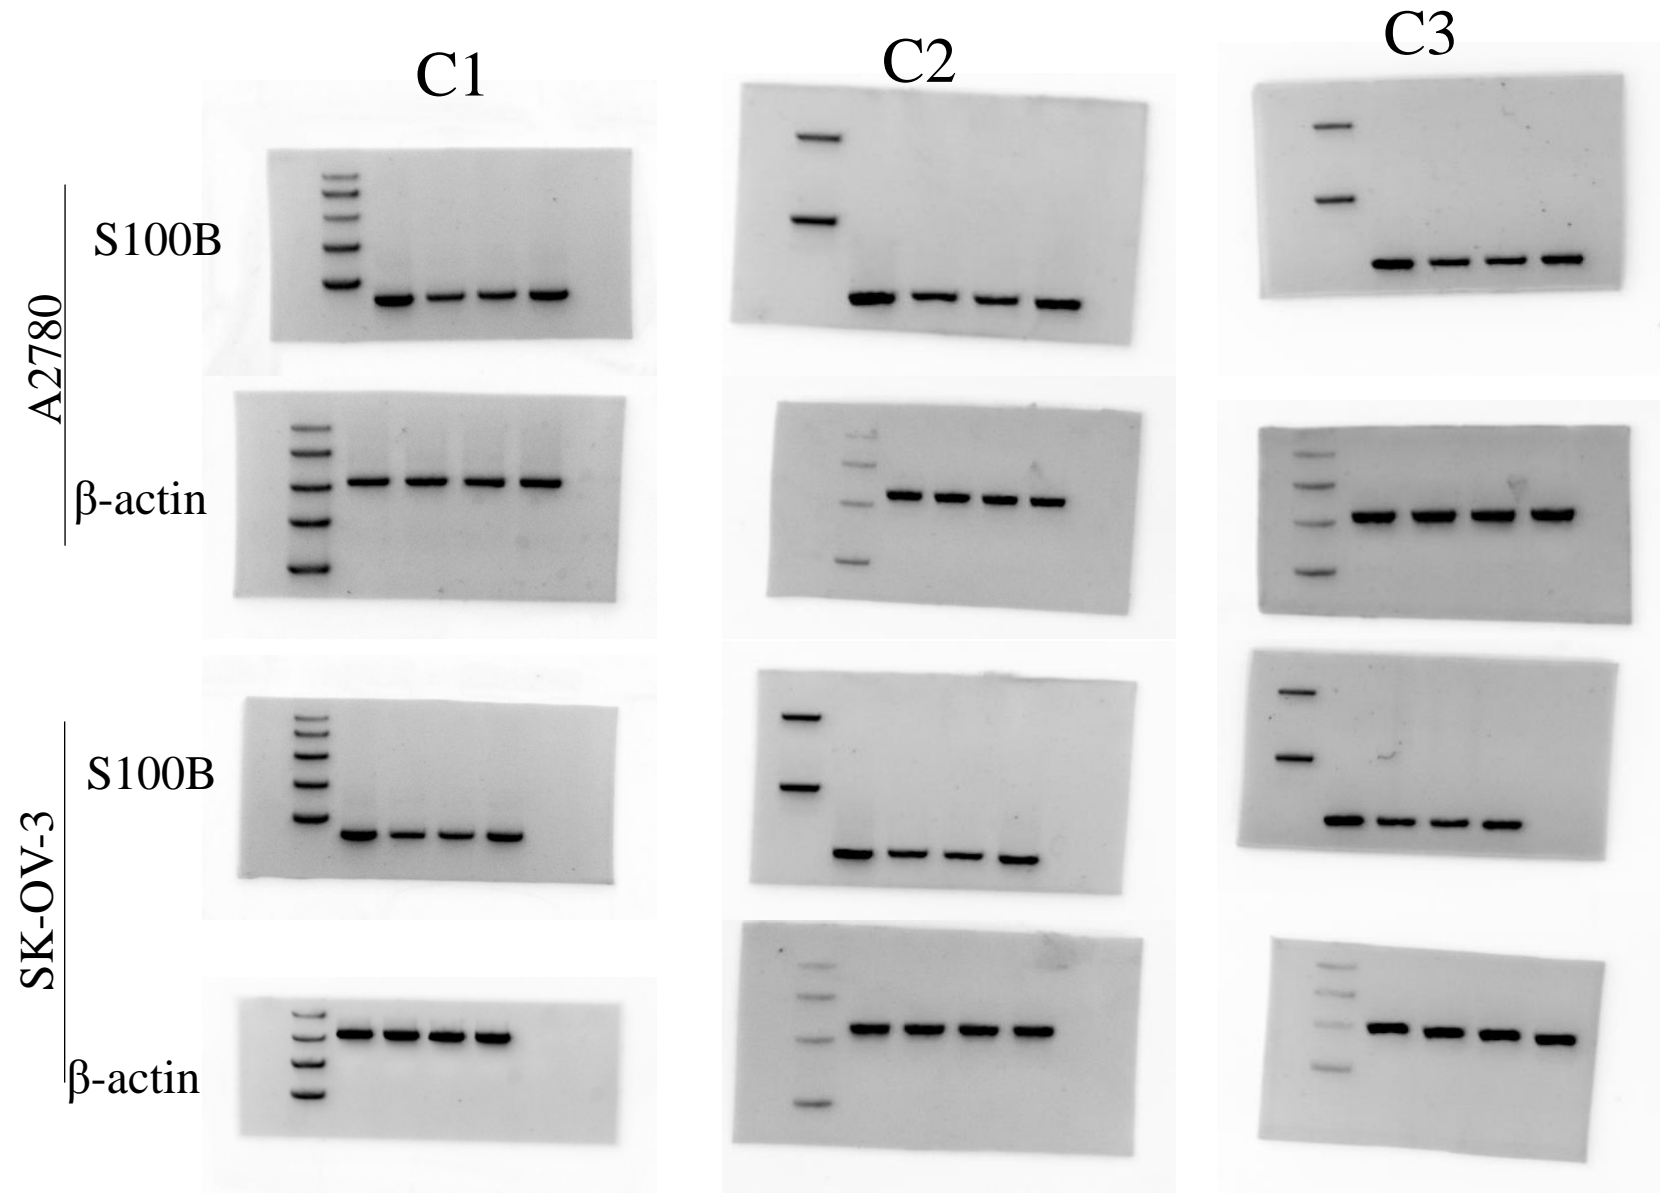



FIG9D

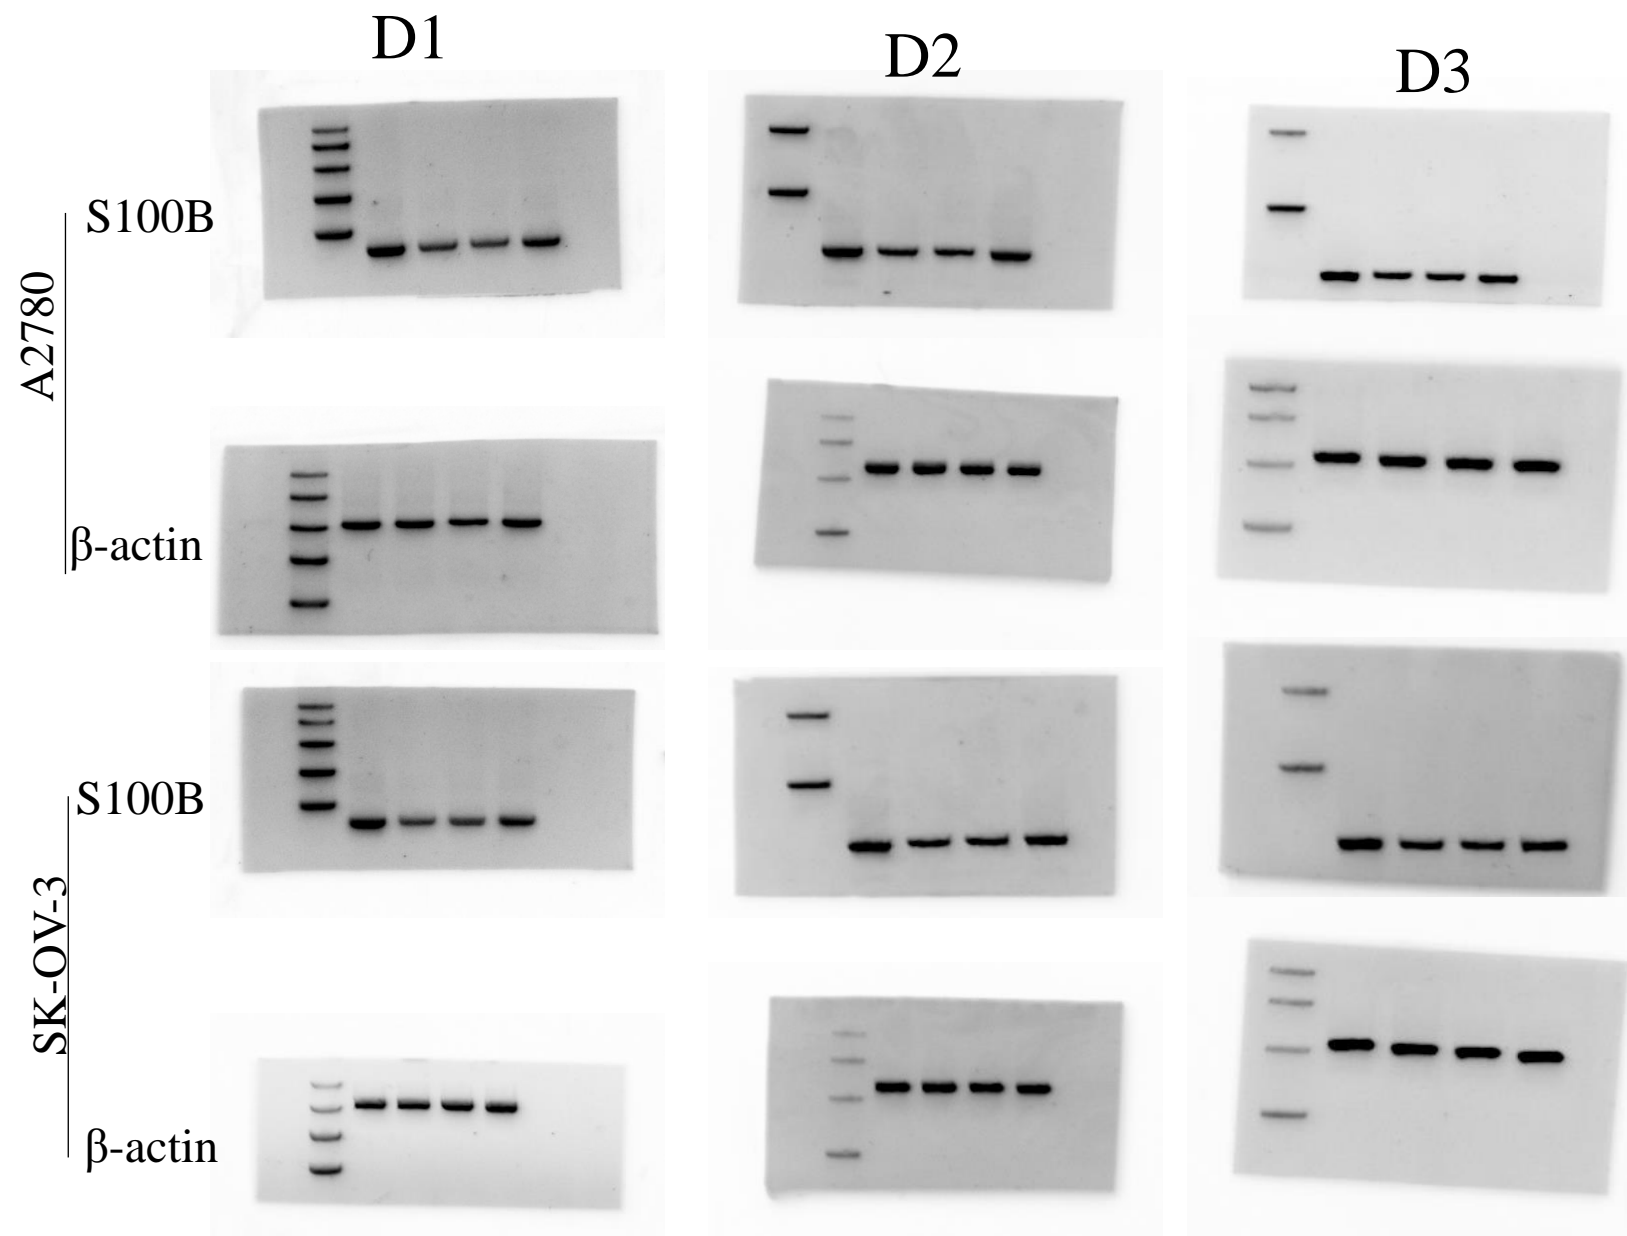

Supplement: 12871_2021_1517_MOESM1_ESM.pdf [file 12871_2021_1517_MOESM1_ESM.pdf]
